# Supplementary material for: Human Psychological Disorder towards Cryptography: True Random Number Generator from EEG of Schizophrenics and Its Application in Block Encryption’s Substitution Box
Source: Hindawi journal article supplement (doi:10.1155/2022/2532497), 2022-06-21
Supplement: f1 [file 2532497.f1.pdf]

**Figure S1****DIFFERENCE\_FUSION ( N, channel )**

---

**Input:** N**Output:** FusedArray**local:** LZ1, LZ2, LZ3, LZ4, NW, NE, SW, SE, Z, GZ1, GZ2, GZ3, GZ4

```
1: for i ← 0 ... ( N - 1) do
2:   LZ1 ← channel i
3:   LZ2 ← channel i+1
4:   LZ3 ← channel i+2
5:   LZ4 ← channel i+3
6:   for j ← 0 ... ( |LZ1| - 3 ) do
7:     GZ1 ← subSting ( LZ1, j, j+4)
8:     GZ2 ← substring ( LZ2, j, j+4 )
9:     GZ3 ← substring ( LZ3, j, j+4 )
10:    GZ4 ← substring ( LZ4, j, j+4 )
11:    if GZ10 = 0 then
12:      NW ← subString(GZ1,0,1)+subString(GZ2,0,1)+subString(GZ1,1,2)+subString(GZ2,1,2)
13:    else
14:      NW ← subString(GZ2,0,1)+subString(GZ1,0,1) +sub(GZ2,1,2)+sub(GZ1,1,2)
15:    end if
16:    if GZ30 = 0 then
18:      NE ← subString(GZ3,0,1)+subString(GZ4,0,1)+subString(GZ3,1,2)+subString(GZ4,1,2)
19:    else
20:      NE ← subString(GZ4,0,1)+subString(GZ3,0,1)+subString(GZ4,1,2)+subString(GZ3,1,2)
21:    end if
22:    if GZ12 = 0 then
23:      SW ← subString(GZ1,2,3)+subString(GZ2,2,3)+subString(GZ1,3,4)+subString(GZ2,3,4)
24:    else
25:      SW ← subString(GZ2,2,3)+subString(GZ1,2,3)+subString(GZ2,3,4)+subString(GZ1,3,4)
26:    end if
27:    if GZ32 = 0 then
28:      SE ← subString(GZ3,2,3) +subString(GZ4,2,3)+subString(GZ3,3,4)+subString(GZ4,3,4)
29:    else
30:      SE ← subString(GZ4,2,3)+subString(GZ3,2,3)+subString(GZ4,3,4)+ subString(GZ3,3,4)
31:    end if
32:    if NW0 = 0 then
33:      Z ← NW+NE+SW+SE
34:    else
35:      Z ← NE + NW + SE + SW
36:    end if
37:    FusedArray ← FusedArray + Z
38:    j ← j+3
39:  end for
40:  i ← i+3
41: end for
42: return FusedArray
```

---

**Figure S2****D2DMG ( FusedArray )**

---

**in:** FusedArray**out:** 2D\_Map [ NMaps ][ 4 ][ 4 ]**local:** 1D integer array frequency [ ]1: | Frequency |  $\leftarrow$  | FusedArray | **div** 32: k  $\leftarrow$  03: **for** i  $\leftarrow$  0 ... ( | Frequency | - 1 ) **do**4:     String3bit  $\leftarrow$  substring ( FusedArray, k ,k+3)5:     Frequency<sub>i</sub>  $\leftarrow$  String3bit.count ( 0 )6:     k  $\leftarrow$  k+37: **end for**8: Frequency  $\leftarrow$  UniqueValues ( Frequency )9: y  $\leftarrow$  010: **for** i  $\leftarrow$  0 ... (256) **do**11:     **for** row  $\leftarrow$  0 ... (4) **do**12:         **for** col  $\leftarrow$  0 ... (4) **do**13:             2D\_Map<sub>i, row, col</sub>  $\leftarrow$  Frequency.get ( y )14:             y  $\leftarrow$  y+115:         **end for**16:     **end for**17: **end for**18: **return** 2D\_Map

---

**Figure S3****ConfusionValuesGenerator ( VectorA,VectorB, RListA, RListB, 2D\_Map, Map\_Index )****Input:** VectorA[ ], VectorB[ ], RListA[ ], RListB [ ], 2D\_Map[ NMaps ][4][4], MapIndex**Output:** mapIndex, SboxValuesArray [ ]

```
1: SboxValuesArray ← list( )
2: outputIndex ← 0
3: Length ← | VectorA |
4: countIndex2 ← 0, countIndex1 ← 0, countIndex0 ← 0
5: mapIndex ← MapIndex
6: for k ← 0 ... ( Length ) do
7:   vAvB ← list( )
8:   rArB ← list( )
9:   for i ← 0 ... (4) do
10:     vAvBAdd ( VectorA i )
11:     rArBAdd( RListA i )
12:   end for
13:   for i ← 0 ... (4) do
14:     vAvBAadd ( VectorB i )
15:     rArBAadd ( RListB i )
16:   end for
17:   for i ← k ... ( k + 8 ) do
18:     value1 ← RListA i
19:     value2 ← RListB i
20:     outputIndex ← 2D_MapmapIndex, value1,value2
21:     if outputIndex == 2 then
22:       for j ← countIndex2 ... (8) do
23:         countIndex2 ← countIndex2 + 1
24:         if outputIndex == rArBj then
25:           SboxValuesArrayAdd ( vAvBj )
26:           break
27:         end if
28:       end for
29:     end if
30:     if outputIndex == 1 then
31:       for j ← countIndex1 ... (8) do
32:         countIndex1 ← countIndex1 + 1
33:         if outputIndex == rArBj then
34:           SboxValuesArrayAdd ( vAvBj )
35:           break
36:         end if
37:       end for
38:     end if
39:     if outputIndex == 0 then
40:       for j ← countIndex0 ... (8) do
41:         countIndex0 ← countIndex0 + 1
42:         if outputIndex == rArBj then
43:           outputAdd ( vAvBj )
44:           break
45:         end if
46:       end for
47:     end if
48:   end for
49:   mapIndex ← mapIndex + 1
50:   k ← k+7
51: end for
52: return SboxValuesArray
```

**Figure S4**

---

**DynamicConfusionComponentGenerator( SboxValuesArray )**

---

**in:** SboxValuesArray [ ]**out:** DynamicSboxArray [ ]

```
1: for i ← 0 ... ( | SboxValuesArray | - 256 ) do
2:   for j ← i ... ( | SboxValuesArray | - 1 ) do
3:     if ( !checkNumberExists ( uniqueNum, SboxValuesArray j ) ) then
4:       uniqueNum ← uniqueNum + SboxValuesArrayj + " # "
5:     end if
6:   end for
7:   currentSbox ← uniqueNum.split ( " # " )
8:   if | currentSbox | < 256 then
9:     break
10:  end if
11:  for j ← 0 ... ( 256 ) do
12:    sbox ← StringToInt ( currentSboxj )
13:  end for
14:  DynamicSboxArray.append ( sbox )
15: end for
16: return DynamicSboxArray
```

---

**Table S1****Shannon's Confusion Component-2**

|     |     |     |     |     |     |     |     |     |     |     |     |     |     |     |     |
|-----|-----|-----|-----|-----|-----|-----|-----|-----|-----|-----|-----|-----|-----|-----|-----|
| 213 | 169 | 228 | 99  | 157 | 168 | 107 | 233 | 183 | 165 | 117 | 247 | 187 | 48  | 34  | 16  |
| 167 | 196 | 120 | 166 | 217 | 33  | 5   | 28  | 44  | 58  | 67  | 45  | 20  | 161 | 37  | 230 |
| 179 | 239 | 134 | 82  | 90  | 72  | 30  | 234 | 49  | 59  | 180 | 159 | 88  | 138 | 85  | 35  |
| 137 | 70  | 77  | 10  | 79  | 57  | 94  | 63  | 129 | 175 | 29  | 111 | 243 | 204 | 246 | 71  |
| 17  | 128 | 194 | 203 | 145 | 149 | 42  | 116 | 176 | 197 | 26  | 181 | 226 | 214 | 227 | 225 |
| 23  | 78  | 8   | 9   | 83  | 252 | 140 | 219 | 1   | 105 | 84  | 95  | 170 | 174 | 7   | 155 |
| 91  | 190 | 158 | 87  | 198 | 163 | 36  | 118 | 96  | 209 | 210 | 104 | 162 | 132 | 186 | 98  |
| 201 | 244 | 61  | 141 | 220 | 223 | 55  | 81  | 178 | 125 | 249 | 130 | 142 | 199 | 241 | 235 |
| 193 | 191 | 164 | 188 | 200 | 108 | 52  | 208 | 206 | 146 | 11  | 4   | 148 | 64  | 73  | 172 |
| 152 | 216 | 221 | 3   | 92  | 215 | 2   | 131 | 245 | 110 | 51  | 184 | 74  | 41  | 124 | 173 |
| 122 | 103 | 229 | 43  | 238 | 89  | 182 | 192 | 222 | 248 | 143 | 24  | 240 | 237 | 202 | 189 |
| 32  | 47  | 147 | 62  | 251 | 12  | 13  | 113 | 114 | 160 | 250 | 50  | 31  | 76  | 46  | 39  |
| 19  | 69  | 212 | 139 | 54  | 153 | 115 | 171 | 255 | 211 | 101 | 21  | 109 | 224 | 15  | 80  |
| 207 | 127 | 231 | 25  | 119 | 38  | 121 | 86  | 133 | 27  | 65  | 66  | 75  | 100 | 144 | 112 |
| 218 | 185 | 177 | 135 | 254 | 14  | 0   | 102 | 53  | 18  | 151 | 123 | 60  | 126 | 68  | 253 |
| 106 | 154 | 40  | 242 | 236 | 22  | 205 | 6   | 156 | 97  | 93  | 232 | 195 | 150 | 136 | 56  |

**Shannon's Confusion Component-3**

|     |     |     |     |     |     |     |     |     |     |     |     |     |     |     |     |
|-----|-----|-----|-----|-----|-----|-----|-----|-----|-----|-----|-----|-----|-----|-----|-----|
| 245 | 7   | 189 | 111 | 57  | 61  | 210 | 208 | 138 | 199 | 216 | 197 | 49  | 18  | 161 | 213 |
| 64  | 218 | 221 | 12  | 130 | 155 | 75  | 192 | 44  | 107 | 69  | 235 | 207 | 170 | 144 | 145 |
| 174 | 50  | 193 | 150 | 56  | 97  | 72  | 8   | 65  | 46  | 32  | 201 | 175 | 209 | 119 | 132 |
| 4   | 135 | 116 | 9   | 244 | 204 | 14  | 33  | 29  | 100 | 253 | 79  | 24  | 15  | 167 | 127 |
| 52  | 35  | 71  | 196 | 163 | 67  | 153 | 230 | 250 | 36  | 254 | 105 | 151 | 136 | 198 | 211 |
| 63  | 251 | 118 | 16  | 200 | 112 | 99  | 194 | 137 | 148 | 40  | 165 | 76  | 240 | 223 | 85  |
| 179 | 94  | 25  | 172 | 164 | 166 | 2   | 6   | 185 | 62  | 169 | 195 | 59  | 181 | 219 | 45  |
| 109 | 187 | 26  | 147 | 122 | 89  | 104 | 93  | 31  | 180 | 5   | 239 | 203 | 17  | 42  | 60  |
| 20  | 234 | 186 | 157 | 129 | 128 | 110 | 77  | 47  | 184 | 11  | 233 | 183 | 248 | 90  | 80  |
| 117 | 113 | 78  | 1   | 95  | 19  | 214 | 229 | 226 | 48  | 108 | 160 | 84  | 241 | 152 | 3   |
| 81  | 0   | 246 | 242 | 249 | 237 | 202 | 176 | 34  | 217 | 243 | 115 | 87  | 73  | 238 | 222 |
| 125 | 247 | 23  | 83  | 70  | 37  | 168 | 51  | 143 | 159 | 123 | 156 | 13  | 66  | 131 | 205 |
| 146 | 140 | 178 | 28  | 96  | 91  | 139 | 41  | 212 | 142 | 158 | 114 | 191 | 21  | 149 | 173 |
| 126 | 121 | 54  | 39  | 38  | 182 | 171 | 252 | 232 | 27  | 228 | 86  | 215 | 101 | 124 | 225 |
| 53  | 206 | 82  | 162 | 134 | 98  | 190 | 133 | 220 | 30  | 55  | 227 | 68  | 88  | 74  | 103 |
| 92  | 224 | 154 | 188 | 58  | 231 | 177 | 120 | 255 | 141 | 106 | 22  | 10  | 102 | 236 | 43  |

### Shannon's Confusion Component-4

---

|     |     |     |     |     |     |     |     |     |     |     |     |     |     |     |     |
|-----|-----|-----|-----|-----|-----|-----|-----|-----|-----|-----|-----|-----|-----|-----|-----|
| 143 | 151 | 209 | 111 | 66  | 117 | 113 | 80  | 122 | 13  | 86  | 116 | 35  | 0   | 34  | 74  |
| 82  | 165 | 228 | 91  | 203 | 253 | 29  | 17  | 71  | 10  | 204 | 199 | 241 | 149 | 161 | 101 |
| 105 | 235 | 20  | 90  | 120 | 139 | 135 | 43  | 83  | 164 | 131 | 207 | 185 | 227 | 255 | 59  |
| 244 | 107 | 194 | 88  | 47  | 243 | 230 | 232 | 148 | 64  | 96  | 251 | 110 | 245 | 163 | 62  |
| 94  | 210 | 153 | 156 | 187 | 134 | 9   | 234 | 184 | 137 | 218 | 226 | 175 | 118 | 221 | 85  |
| 246 | 106 | 170 | 40  | 169 | 48  | 97  | 53  | 102 | 249 | 127 | 45  | 217 | 191 | 67  | 15  |
| 49  | 104 | 65  | 238 | 72  | 70  | 176 | 130 | 46  | 252 | 177 | 201 | 202 | 190 | 8   | 178 |
| 214 | 124 | 220 | 4   | 180 | 77  | 37  | 33  | 36  | 63  | 250 | 3   | 150 | 205 | 50  | 188 |
| 193 | 68  | 41  | 166 | 22  | 211 | 7   | 142 | 222 | 197 | 208 | 224 | 181 | 183 | 61  | 125 |
| 76  | 126 | 79  | 69  | 39  | 192 | 92  | 171 | 154 | 138 | 216 | 38  | 95  | 123 | 195 | 2   |
| 18  | 56  | 141 | 189 | 52  | 89  | 206 | 167 | 145 | 73  | 99  | 147 | 32  | 78  | 237 | 119 |
| 200 | 172 | 42  | 93  | 84  | 103 | 55  | 6   | 152 | 182 | 81  | 19  | 231 | 225 | 160 | 1   |
| 198 | 132 | 223 | 133 | 5   | 247 | 26  | 159 | 128 | 240 | 31  | 239 | 108 | 44  | 24  | 219 |
| 212 | 157 | 144 | 58  | 236 | 173 | 186 | 140 | 11  | 12  | 30  | 115 | 174 | 28  | 155 | 100 |
| 27  | 98  | 196 | 114 | 109 | 60  | 158 | 21  | 129 | 213 | 75  | 254 | 136 | 54  | 215 | 242 |
| 168 | 112 | 25  | 14  | 248 | 233 | 162 | 87  | 16  | 121 | 57  | 229 | 51  | 23  | 179 | 146 |

---

### Shannon's Confusion Component-5

---

|     |     |     |     |     |     |     |     |     |     |     |     |     |     |     |     |
|-----|-----|-----|-----|-----|-----|-----|-----|-----|-----|-----|-----|-----|-----|-----|-----|
| 77  | 53  | 12  | 72  | 165 | 120 | 174 | 17  | 139 | 96  | 51  | 164 | 254 | 1   | 200 | 105 |
| 176 | 66  | 145 | 83  | 70  | 117 | 189 | 138 | 60  | 220 | 150 | 134 | 204 | 132 | 75  | 166 |
| 191 | 154 | 16  | 208 | 74  | 160 | 143 | 109 | 10  | 255 | 137 | 238 | 186 | 201 | 90  | 247 |
| 219 | 24  | 84  | 98  | 38  | 11  | 94  | 95  | 63  | 217 | 81  | 30  | 42  | 40  | 121 | 115 |
| 114 | 242 | 103 | 89  | 43  | 29  | 173 | 141 | 67  | 192 | 237 | 162 | 136 | 142 | 253 | 64  |
| 85  | 144 | 251 | 140 | 19  | 49  | 147 | 21  | 133 | 171 | 123 | 243 | 28  | 73  | 169 | 225 |
| 167 | 202 | 112 | 188 | 207 | 87  | 0   | 113 | 4   | 48  | 118 | 78  | 80  | 213 | 41  | 32  |
| 172 | 187 | 110 | 79  | 97  | 211 | 116 | 205 | 158 | 170 | 68  | 20  | 18  | 65  | 52  | 119 |
| 106 | 15  | 104 | 62  | 153 | 5   | 248 | 126 | 93  | 13  | 58  | 235 | 185 | 102 | 25  | 127 |
| 99  | 59  | 129 | 122 | 216 | 218 | 125 | 245 | 250 | 193 | 124 | 128 | 244 | 39  | 161 | 135 |
| 108 | 223 | 194 | 111 | 226 | 56  | 101 | 175 | 151 | 107 | 197 | 246 | 203 | 3   | 36  | 233 |
| 222 | 50  | 231 | 210 | 234 | 146 | 22  | 45  | 131 | 23  | 157 | 180 | 55  | 2   | 149 | 57  |
| 155 | 249 | 221 | 159 | 212 | 214 | 241 | 232 | 14  | 8   | 183 | 184 | 26  | 6   | 236 | 168 |
| 34  | 100 | 198 | 152 | 239 | 46  | 215 | 163 | 228 | 61  | 47  | 82  | 190 | 182 | 224 | 196 |
| 76  | 31  | 199 | 44  | 156 | 88  | 229 | 148 | 240 | 130 | 179 | 209 | 7   | 252 | 177 | 54  |
| 91  | 230 | 37  | 227 | 195 | 69  | 206 | 27  | 33  | 9   | 35  | 181 | 92  | 86  | 71  | 178 |

---

### Shannon's Confusion Component-6

---

|     |     |     |     |     |     |     |     |     |     |     |     |     |     |     |     |
|-----|-----|-----|-----|-----|-----|-----|-----|-----|-----|-----|-----|-----|-----|-----|-----|
| 79  | 151 | 253 | 186 | 169 | 48  | 178 | 168 | 121 | 217 | 138 | 8   | 163 | 205 | 35  | 127 |
| 108 | 94  | 218 | 206 | 43  | 180 | 174 | 154 | 224 | 110 | 70  | 201 | 109 | 175 | 96  | 69  |
| 41  | 105 | 20  | 134 | 12  | 199 | 78  | 227 | 211 | 230 | 77  | 18  | 247 | 195 | 21  | 30  |
| 17  | 64  | 107 | 88  | 237 | 119 | 147 | 26  | 162 | 98  | 136 | 34  | 90  | 176 | 213 | 216 |
| 156 | 209 | 55  | 238 | 114 | 83  | 54  | 22  | 179 | 36  | 27  | 207 | 129 | 126 | 33  | 7   |
| 104 | 245 | 125 | 132 | 131 | 1   | 188 | 60  | 66  | 220 | 51  | 137 | 65  | 5   | 46  | 244 |
| 56  | 155 | 225 | 243 | 50  | 255 | 57  | 2   | 235 | 115 | 61  | 145 | 252 | 212 | 192 | 16  |
| 93  | 193 | 29  | 142 | 250 | 68  | 246 | 97  | 111 | 42  | 81  | 130 | 23  | 106 | 241 | 197 |
| 219 | 95  | 80  | 249 | 157 | 144 | 183 | 53  | 128 | 203 | 152 | 158 | 45  | 91  | 87  | 4   |
| 102 | 140 | 139 | 116 | 232 | 24  | 208 | 234 | 254 | 182 | 59  | 122 | 13  | 214 | 10  | 171 |
| 242 | 165 | 82  | 153 | 173 | 19  | 248 | 31  | 196 | 3   | 63  | 101 | 159 | 172 | 37  | 185 |
| 202 | 58  | 84  | 120 | 187 | 233 | 161 | 15  | 75  | 146 | 215 | 141 | 32  | 189 | 149 | 160 |
| 47  | 100 | 28  | 25  | 11  | 73  | 200 | 14  | 226 | 62  | 92  | 76  | 103 | 49  | 228 | 40  |
| 181 | 191 | 223 | 72  | 9   | 221 | 38  | 39  | 231 | 167 | 240 | 86  | 210 | 113 | 0   | 148 |
| 229 | 112 | 67  | 52  | 166 | 85  | 71  | 74  | 135 | 124 | 118 | 251 | 123 | 164 | 190 | 117 |
| 99  | 150 | 177 | 89  | 6   | 143 | 133 | 44  | 184 | 239 | 236 | 170 | 204 | 198 | 222 | 194 |

---
